# Supplementary material for: Weight Loss Promotion in Individuals with Obesity through Gut Microbiota Alterations with a Multiphase Modified Ketogenic Diet
Source: MDPI journal article supplement (doi:10.3390/nu15194163), 2023-09-27
Supplement: s1 [file s1]

Supplementary Materials

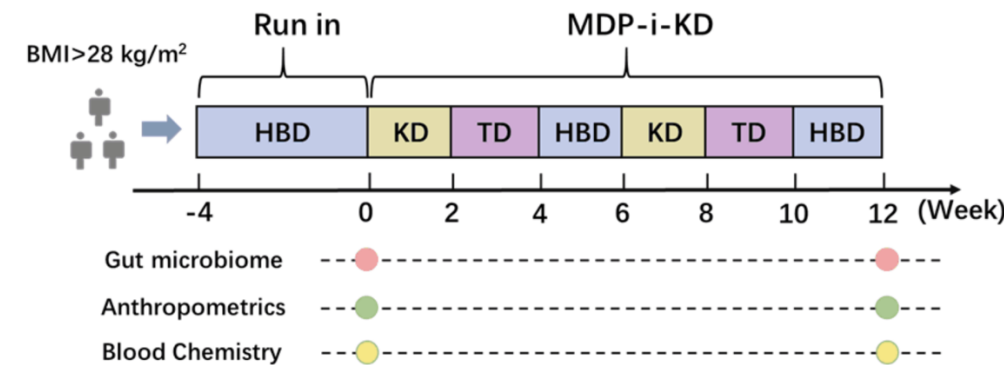

**Figure S1.** Study design. KD, ketogenic diet; TD, transition diet; HBD, hypocaloric balanced diet.

**Table S1.** Nutrient component of the KD, TD and HBD.

| Nutrient component        | KD <sup>1</sup> | TD <sup>2</sup> | HBD <sup>3</sup> |
|---------------------------|-----------------|-----------------|------------------|
| Carbohydrate, % of energy | 27              | 29              | 39               |
| Fat, % of energy          | 41              | 42              | 37               |
| Protein, % of energy      | 32              | 29              | 24               |

KD<sup>1</sup>, ketogenic diet. According to the actual measured basal metabolism of the patient's InBody S10 body composition meter, the total calories for this stage. If the basal metabolism exceeds 1500 kcal, it will be calculated as 1500 kcal. TD<sup>2</sup>, transition diet. Multiply the basal metabolism actually measured by the patient's InBody S10 body composition meter by 1.1 to calibrate the total calories for this stage. HBD<sup>3</sup>, hypocaloric balanced diet. Multiply the basal metabolism actually measured by the patient's InBody S10 body composition meter by 1.2 to calibrate the total calories for this stage.

**Table S2.** Food selection range of the KD,TD and HBD.

| Food category | KD                                                                                                 | TD                                                                                                                                                  | HBD                                                                                                                                                       |
|---------------|----------------------------------------------------------------------------------------------------|-----------------------------------------------------------------------------------------------------------------------------------------------------|-----------------------------------------------------------------------------------------------------------------------------------------------------------|
| Carbohydrate  | Whole grains, bran, try to choose carbohydrates with a GI value of less than 55 as the staple food | Whole grains, bran and other miscellaneous grains, try to choose carbohydrates with a GI value of less than 65 as the staple food, and add potatoes | Whole grains, potatoes, brown rice, rice noodle products, carbohydrates with a GI value of less than 65 should account for 50% of the total carbohydrates |

|                  |                                                                                |                                                                                                                                             |                                                                                                                                                           |
|------------------|--------------------------------------------------------------------------------|---------------------------------------------------------------------------------------------------------------------------------------------|-----------------------------------------------------------------------------------------------------------------------------------------------------------|
| Fat              | olive oil, linseed oil                                                         | Olive oil, linseed oil,<br>tea seed oil                                                                                                     | Olive oil, linseed oil,<br>tea seed oil                                                                                                                   |
| Lean meat        | livestock lean meat,<br>poultry lean meat                                      | livestock lean meat,<br>poultry lean meat                                                                                                   | livestock lean meat,<br>poultry lean meat                                                                                                                 |
| Vegetable        | Tender stems, leaves,<br>cauliflower, onion and<br>garlic, fungus and<br>algae | Tender stems, leaves,<br>cauliflower, onion and<br>garlic, fungus and<br>algae<br>Can be added:<br>eggplant fruit, melons<br>and vegetables | Tender stems, leaves,<br>cauliflower, onion and<br>garlic, fungus and<br>algae Can be added:<br>eggplant, melons and<br>vegetables, aquatic<br>vegetables |
| Aquatic products | freshwater fish,<br>freshwater shrimp                                          | freshwater fish,<br>freshwater shrimp<br>Can add sea fish and<br>shrimp                                                                     | Freshwater fish,<br>freshwater shrimp<br>Can add sea fish,<br>shrimp, shellfish                                                                           |
| Fruit            | \                                                                              | Apple, kiwi, citrus                                                                                                                         | Apple, kiwi, citrus                                                                                                                                       |
| Nut              | \                                                                              | Walnuts,pistachios,<br>almonds, cashews, etc.                                                                                               | Walnuts,pistachios,<br>almonds, cashews, etc.                                                                                                             |

KD, ketogenic diet; TD, transition diet; HBD, hypocaloric balanced diet; GI:Glycemic Index.

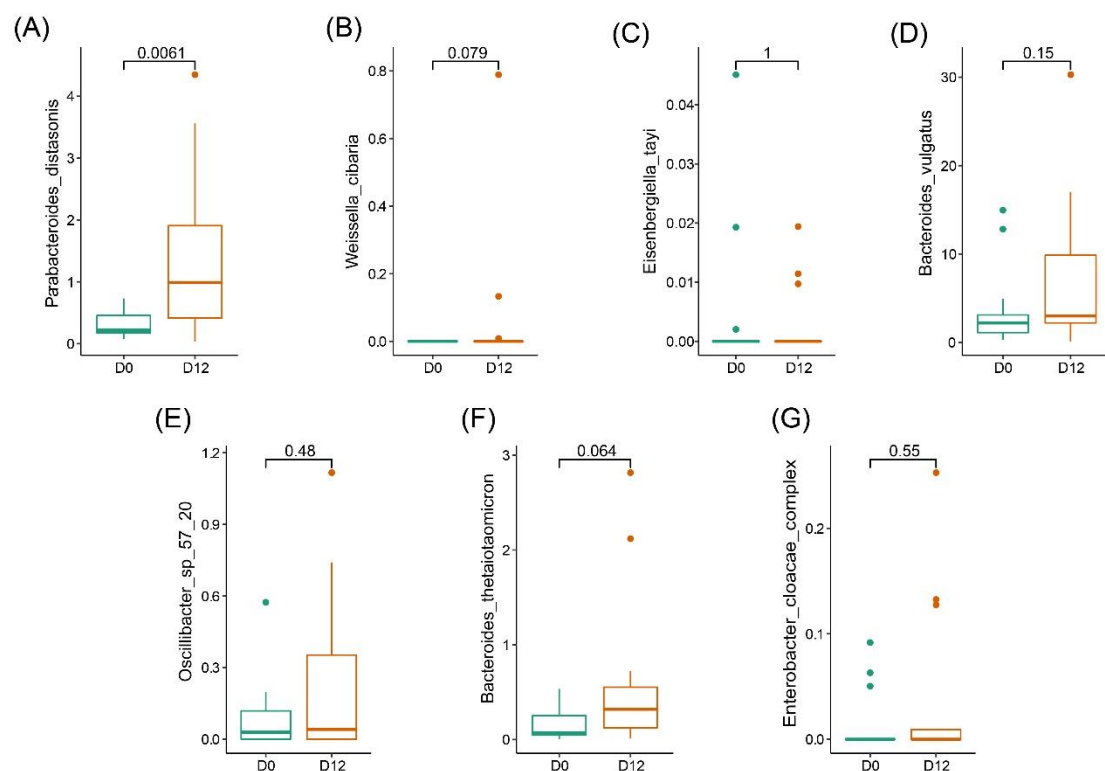

**Figure S2.** Alterations in the relative abundance of seven microbial features Identified by GB feature selection method pre- and post-intervention.

**Table S3.** Gut microbiota metabolic pathways with relatively high contribution of (a) *Blautia obeum*; (b) *Ruminococcus torques*.

| (a)                       |                                                                 |              |               |                |
|---------------------------|-----------------------------------------------------------------|--------------|---------------|----------------|
| Metabolic Pathway         | Function                                                        | D0<br>(mean) | D12<br>(mean) | <i>P</i> value |
| ARO-PWY                   | Branched acid biosynthesis I                                    | 18614.038    | 16344.379     | 0.039          |
| BRANCHED-CHAIN-AA-SYN-PWY | Super channel of branched chain amino acid biosynthesis         | 11797.022    | 10511.632     | 0.264          |
| COBALSYN-PWY              | Recovery of cobalamine adenosine from coenzyme A amine I        | 5828.041     | 4717.161      | 0.505          |
| COMPLETE-ARO-PWY          | Super channel of aromatic amino acid biosynthesis               | 17418.475    | 15535.210     | 0.044          |
| DTDPRHAMSYN-PWY           | DTDP-L-rhamnose biosynthesis I (DP-D-glucose)                   | 9566.681     | 7947.129      | 0.418          |
| GLYCOGENSYNTH-PWY         | Glycogen biosynthesis I (from A                                 | 4404.829     | 3726.378      | 0.287          |
| ILEUSYN-PWY               | L-isoleucine biosynthesis I (from threonine)                    | 18254.430    | 16585.280     | 0.091          |
| NONMEVIPP-PWY             | Methylerythritol phosphate pathway I                            | 16082.643    | 15656.113     | 0.614          |
| NONOXIPENT-PWY            | Pentose phosphate pathway (non oxidative branch)                | 11080.130    | 8875.047      | 0.390          |
| PWY-1861                  | Formaldehyde Assimilation II (Hip Circulation)                  | 252.879      | 333.931       | 0.570          |
| PWY-5103                  | L-isoleucine biosynthesisIII                                    | 10905.550    | 9543.020      | 0.264          |
| PWY-5188                  | Tetrapyrrole biosynthesis I (from glutamate)                    | 6069.769     | 4911.776      | 0.223          |
| PWY-5189                  | Tetrapyrrole biosynthesis II (from glycine)                     | 816.737      | 1102.869      | 0.920          |
| PWY-6163                  | Synthesis of Branched Esters from 3-Dehydroquinine              | 18642.076    | 16558.230     | 0.044          |
| PWY-621                   | sucrose degradation III (sucrose invertase)                     | 8488.001     | 6578.999      | 0.186          |
| PWY-6305                  | Putrescine Biosynthesis IV                                      | 3951.764     | 2881.691      | 0.762          |
| PWY-6317                  | Galactose degradation I (Leloir pathway)                        | 11624.214    | 8998.430      | 0.139          |
| PWY-6595                  | A Super Channel for Guanosine Nucleotide Degradation            | 609.777      | 663.613       | 0.920          |
| PWY-6606                  | Guanosine Nucleotide Degradation II                             | 1020.622     | 1136.120      | 0.920          |
| PWY-6608                  | guanosine nucleotide degradation III                            | 3009.835     | 2974.265      | 0.724          |
| PWY66-422                 | D-galactose degradation V (Leloir pathway)                      | 11624.214    | 9107.143      | 0.153          |
| THISYNARA-PWY             | Thiamine diphosphate biosynthesis super channel III (eukaryote) | 4834.055     | 4716.455      | 0.915          |
| TRPSYN-PWY                | L-Tryptophan Biosynthesis                                       | 6001.250     | 4791.738      | 0.186          |
| (b)                       |                                                                 |              |               |                |
| Metabolic Pathway         | Function                                                        | D0<br>(mean) | D12<br>(mean) | <i>P</i> value |

|                      |                                                                                                   |           |           |       |
|----------------------|---------------------------------------------------------------------------------------------------|-----------|-----------|-------|
| ARGSYN-PWY           | L-arginine biosynthesis I (via L-ornithine)                                                       | 9202.040  | 6763.840  | 0.243 |
| ARGSYNBSUB-PWY       | L-arginine biosynthesis II (acetyl cycle)                                                         | 6240.492  | 4577.494  | 0.287 |
| ARO-PWY              | Branched Acid Biosynthesis I                                                                      | 18614.038 | 16344.379 | 0.039 |
| COA-PWY-1            | Coenzyme A Biosynthesis II (Mammals)                                                              | 17248.859 | 16304.815 | 0.362 |
| COA-PWY              | Coenzyme A Biosynthesis I                                                                         | 6338.581  | 5122.028  | 0.687 |
| COBALSYN-PWY         | Extraction of cobalamine adenosine from cobalamide I                                              | 5828.041  | 4717.161  | 0.505 |
| DTDPRHAMSYN-PWY      | dTDP-L-rhamnose biosynthesis I                                                                    | 9566.681  | 7947.129  | 0.418 |
| GLCMANNANAUT-PWY     | Super pathway of N-acetylglucosamine, N-acetylmannosamine and N-acetylneuraminic acid degradation | 6855.384  | 5677.089  | 0.545 |
| GLUTORN-PWY          | L-ornithine biosynthesis                                                                          | 4690.259  | 3608.188  | 0.336 |
| HOMOSER-METSYN-PWY   | L-Methionine Biosynthesis I                                                                       | 3651.106  | 3001.639  | 0.186 |
| MET-SAM-PWY          | Super pathway of S-adenosyl-L-methionine biosynthesis                                             | 5948.648  | 4880.070  | 0.169 |
| METSYN-PWY           | Biosynthesis of L-homoserine and L-methionine                                                     | 5816.911  | 4749.004  | 0.169 |
| NONMEVIPP-PWY        | Methylerythritol phosphate pathway I                                                              | 16082.643 | 15656.113 | 0.614 |
| NONOXIPENT-PWY       | pentose phosphate pathway (non oxidative branch)                                                  | 11080.130 | 8875.047  | 0.390 |
| PANTO-PWY            | Phosphothenate Biosynthesis I                                                                     | 12737.325 | 12859.154 | 0.920 |
| PANTOSYN-PWY         | Pantothenic acid and coenzyme A biosynthesis I                                                    | 7536.670  | 7164.203  | 0.614 |
| PEPTIDOGLYCANSYN-PWY | peptidoglycan biosynthesis I (including m-diaminoacrylamide)                                      | 18860.404 | 17576.324 | 0.169 |
| PWY-1042:            | Glycolysis IV (plant cytoplasm)                                                                   | 16945.373 | 15459.909 | 0.545 |
| PWY-2942             | lysine biosynthesis III                                                                           | 13974.584 | 14096.729 | 0.840 |
| PWY-5097             | lysine biosynthesis VI                                                                            | 15130.618 | 15426.686 | 0.687 |
| PWY-5100             | Acetic acid and lactic acid production by pyruvic acid fermentation II                            | 5675.973  | 4677.573  | 0.362 |
| PWY-5154             | L-Arginine Biosynthesis III (via N-acetyl-L-citrulline)                                           | 2114.623  | 2575.627  | 0.687 |
| PWY-5347             | Super pathway of L-methionine biosynthesis (reverse sulfurization)                                | 5621.599  | 4675.947  | 0.125 |
| PWY-5367             | Petroleum Arginine Biosynthesis                                                                   | 1059.292  | 767.570   | 0.555 |
| PWY-5667             | CDP diacylglycerol biosynthesis I                                                                 | 17218.189 | 16365.516 | 0.101 |
| PWY-5686             | UMP biosynthesis                                                                                  | 19617.648 | 18389.549 | 0.287 |
| PWY-5695             | Uric acid biosynthesis/inosine 5 '-phosphate degradation                                          | 9828.490  | 11062.887 | 0.479 |
| PWY-5973             | cis vaccinate biosynthesis                                                                        | 6219.174  | 7051.029  | 0.311 |

|           |                                                                                        |           |           |       |
|-----------|----------------------------------------------------------------------------------------|-----------|-----------|-------|
| PWY-6121  | 5-Aminoimidazole Ribonucleotide Biosynthesis I                                         | 17669.524 | 15052.789 | 0.022 |
| PWY-6122  | 5-Aminoimidazole Ribonucleotide Biosynthesis II                                        | 17606.649 | 14893.396 | 0.022 |
| PWY-6151  | S-adenosyl-L-methionine cycle                                                          | 16891.740 | 16135.969 | 0.545 |
| PWY-6163  | Synthesis of Branched Esters from 3-Dehydroquinine                                     | 18642.076 | 16558.230 | 0.044 |
| PWY-621   | sucrose degradation III (sucrose invertase)                                            | 8488.001  | 6578.999  | 0.186 |
| PWY-6277  | 5-aminoimidazole ribonucleotide biosynthesis pathway                                   | 17606.649 | 14893.396 | 0.022 |
| PWY-6305  | Putrescine Biosynthesis IV                                                             | 3951.764  | 2881.691  | 0.762 |
| PWY-6317  | Galactose degradation I (Leloir pathway)                                               | 11624.214 | 8998.430  | 0.139 |
| PWY-6385  | peptidoglycan biosynthesis III (Mycobacterium)                                         | 9972.206  | 10281.526 | 0.880 |
| PWY-6386  | UDP-N-acetyl-tetramyl pentapeptide biosynthesis II (containing lysine)                 | 19958.911 | 18558.718 | 0.101 |
| PWY-6387  | UDP-N-acetyl-tetramyl pentapeptide biological synthesis I (including m-diaminotoluene) | 19152.854 | 17828.573 | 0.153 |
| PWY-6608  | Guanosine nucleotide degradation III                                                   | 3009.835  | 2974.265  | 0.724 |
| PWY-6609  | Adenine and adenosine                                                                  | 8181.517  | 6791.901  | 0.880 |
| PWY-6700  | Quinoxin biosynthesis                                                                  | 11240.230 | 11988.873 | 0.223 |
| PWY-6703  | preQ0 biosynthesis                                                                     | 7403.424  | 8585.974  | 0.223 |
| PWY-6737  | starch degradation V                                                                   | 22301.514 | 19142.046 | 0.026 |
| PWY-7111  | Production of isobutanol by pyruvic acid fermentation (engineering)                    | 18254.430 | 17099.992 | 0.204 |
| PWY-7208  | Hyperpathway of Pyrimidine Base                                                        | 6675.339  | 6823.814  | 0.840 |
| PWY-7219  | Adenosine ribonucleotide de novo biosynthesis                                          | 25418.262 | 23116.118 | 0.223 |
| PWY-7221  | De novo Biosynthesis of Guanine Nucleoside                                             | 17568.247 | 16455.484 | 0.186 |
| PWY-724   | Super channel of lysine, threonine and methionine biosynthesis                         | 12225.285 | 11372.835 | 0.390 |
| PWY0-1319 | CDP diacylglycerol biosynthesis II                                                     | 17220.060 | 16368.053 | 0.101 |
| PWY-7357  | Thiamine and oxythiamine (yeast) form thiamine                                         | 10312.617 | 10071.626 | 0.801 |
| PWY-7400  | L-Arginine Biosynthesis IV (Archaea)                                                   | 9686.627  | 7159.750  | 0.243 |
| PWY0-1296 | purine ribonucleoside degradation                                                      | 15408.759 | 12720.948 | 0.091 |
| PWY0-1297 | Superpathway of purine deoxynucleoside degradation                                     | 2868.570  | 2614.038  | 0.448 |
| PWY66-422 | D-galactose degradation V (Leloir pathway)                                             | 11624.214 | 9107.143  | 0.153 |

|                  |                                                                 |           |           |       |
|------------------|-----------------------------------------------------------------|-----------|-----------|-------|
| RHAMCAT-PWY      | L-rhamnose degradation I                                        | 3651.990  | 4657.016  | 0.287 |
| SALVADEHYPOX-PWY | Adenosine Nucleotide Degradation II                             | 2213.522  | 2501.582  | 0.650 |
| SER-GLYSYN-PWY   | Super channel I for L-serine and glycine biosynthesis           | 6599.363  | 5484.743  | 0.511 |
| THISYN-PWY       | Super channel I of thiamine diphosphate biosynthesis            | 1606.382  | 1693.235  | 0.724 |
| THISYNARA-PWY    | Thiamine diphosphate biosynthesis super channel III (eukaryote) | 4834.055  | 4716.455  | 0.915 |
| TRPSYN-PWY       | L-Tryptophan Biosynthesis                                       | 6001.250  | 4791.738  | 0.186 |
| VALSYN-PWY       | L-valine biosynthesis                                           | 18254.430 | 16585.280 | 0.091 |
